# Supplementary material for: Hydrothermal Synthesis of MnO2/Reduced Graphene Oxide Composite for 4-Nitrophenol Sensing Applications
Source: MDPI journal article supplement (doi:10.3390/inorganics10120219), 2022-11-24
Supplement: s1 [file s1]

## Supporting information

### Hydrothermal Synthesis of MnO<sub>2</sub>/Reduced Graphene Oxide Composite for 4-Nitrophenol Sensing Application

Praveen Kumar <sup>1,†</sup>, Mohd Quasim Khan <sup>2</sup>, Rais Ahmad Khan <sup>3</sup>, Khursheed Ahmad <sup>4,†</sup>,  
Haekyoung Kim <sup>4,\*</sup>

<sup>1</sup>*Department of Chemistry, Indian Institute of Technology Indore, Simrol, Khandwa Road, M.P. 453552, India*

<sup>2</sup>*Department of Chemistry, M.M.D.C, Moradabad, M.J.P. Rohilkhand University, Bareilly 244001, India*

<sup>3</sup>*Department of Chemistry, College of Science, King Saud University, Riyadh 11451, Kingdom of Saudi Arabia*

<sup>4</sup>*School of Materials Science and Engineering, Yeungnam University, Gyeongsan 38541, Republic of Korea*

<sup>†</sup>*Authors contributed equally.*

<sup>\*</sup> *Correspondence: (hkkim@ynu.ac.kr).*

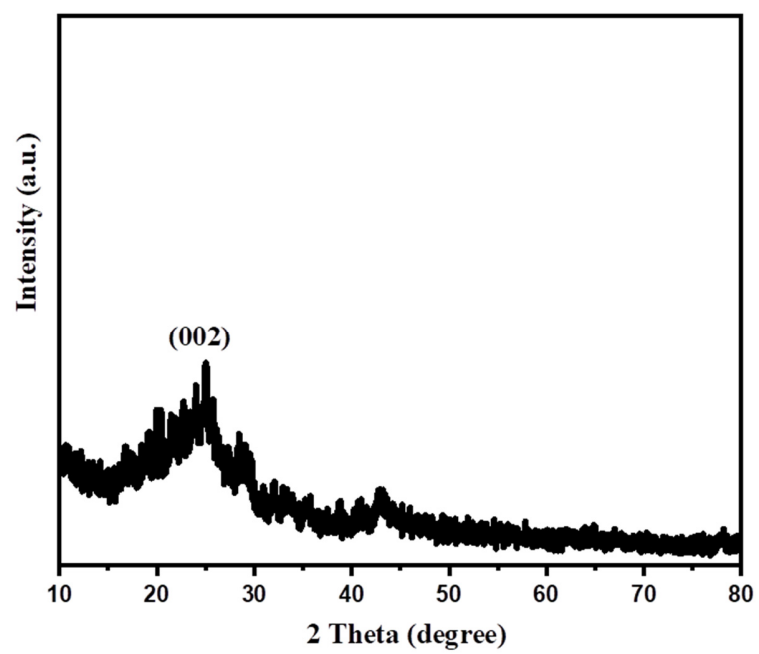

**Figure S1.** XRD pattern of rGO.

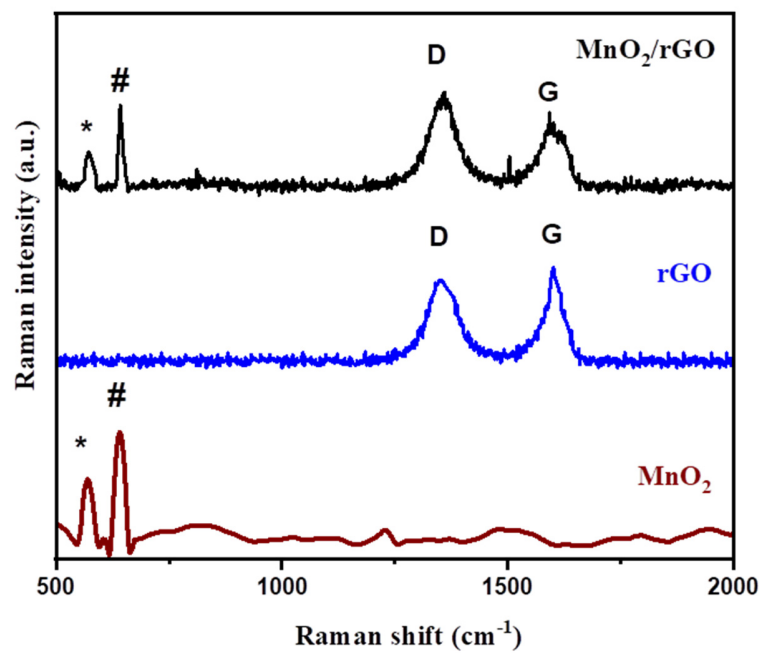

**Figure S2.** Raman spectra of rGO, MnO<sub>2</sub> and MnO<sub>2</sub>/rGO.

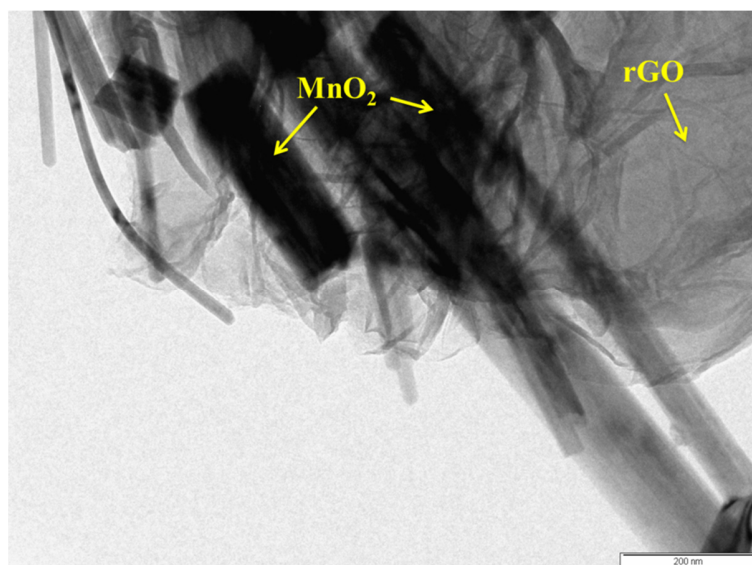

**Figure S3.** TEM image of  $\text{MnO}_2/\text{rGO}$ .

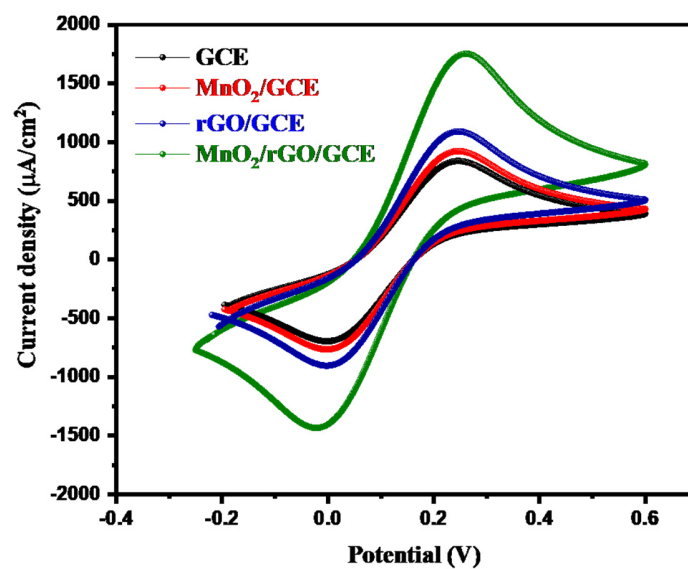

**Figure S4.** CV of GCE,  $\text{MnO}_2/\text{GCE}$ , rGO/GCE and  $\text{MnO}_2/\text{rGO}/\text{GCE}$

in 5 mM  $[\text{Fe}(\text{CN})_6]^{3-/4-}$  redox couple at scan rate of 100 mV/s.

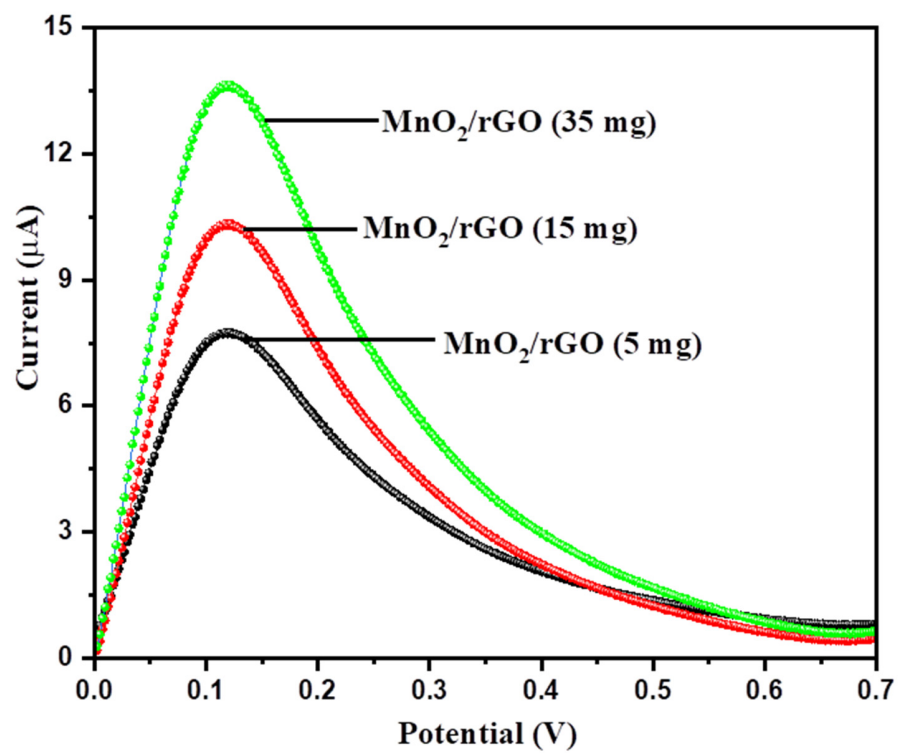

**Figure S5.** LSV curves of MnO<sub>2</sub>/rGO/GCE (5 mg, 15 mg and 35 mg) in 50 μM 4-NP (PBS = 0.1 M; pH = 7.0; scan rate = 50 mV/s).

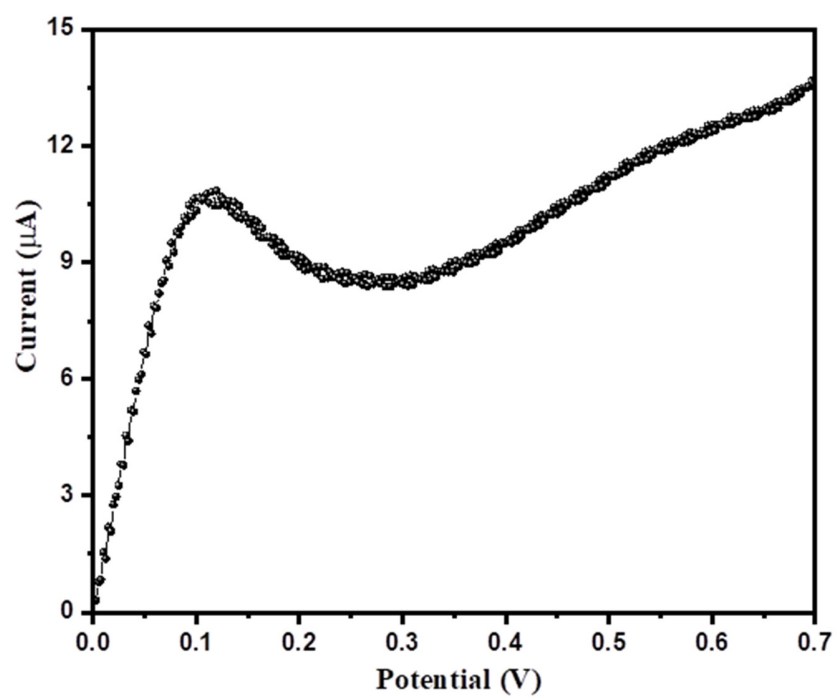

**Figure S6.** LSV curve of MnO<sub>2</sub>/rGO/GCE (physically mixed) in 50 μM 4-NP (PBS =0.1 M; pH= 7.0; scan rate = 50 mV/s).
